# Supplementary material for: Initial Findings From an Acute Hospital Care at Home Waiver Initiative
Source: PubMed Central journal article supplement (PMC10625041; doi:10.1001/jamahealthforum.2023.3667), 2023-11-03
Supplement: jamahealthforum-e233667-s001.pdf [file jamahealthforum-e233667-s001.pdf]

## Supplemental Online Content

Adams D, Wolfe AJ, Warren, J, Laberge A, Richards AC, Herzer K, Fleisher LA. Initial findings from an acute hospital care at home waiver initiative. *JAMA Health Forum*. 2023;4(11):e233667. doi:10.1001/jamahealthforum.2023.3667

**eMethods.** Supplemental Figure and Tables

**eFigure.** Geographic Distribution of the Use of the CMS Waiver as of March 20, 2023

**eTable 1.** Standard Operating Procedure for CMS Evaluation of Unexpected Mortality of a Patient Served by a Hospital With an Approved AHCAH Waiver

**eTable 2.** Attributes of a Successful Acute Hospital Care at Home Waiver (Participation) Request

This supplemental material has been provided by the authors to give readers additional information about their work.

**eMethods.** Supplemental Figure and Tables

**eFigure.** Geographic distribution of the use of the CMS waiver as of March 20, 2023

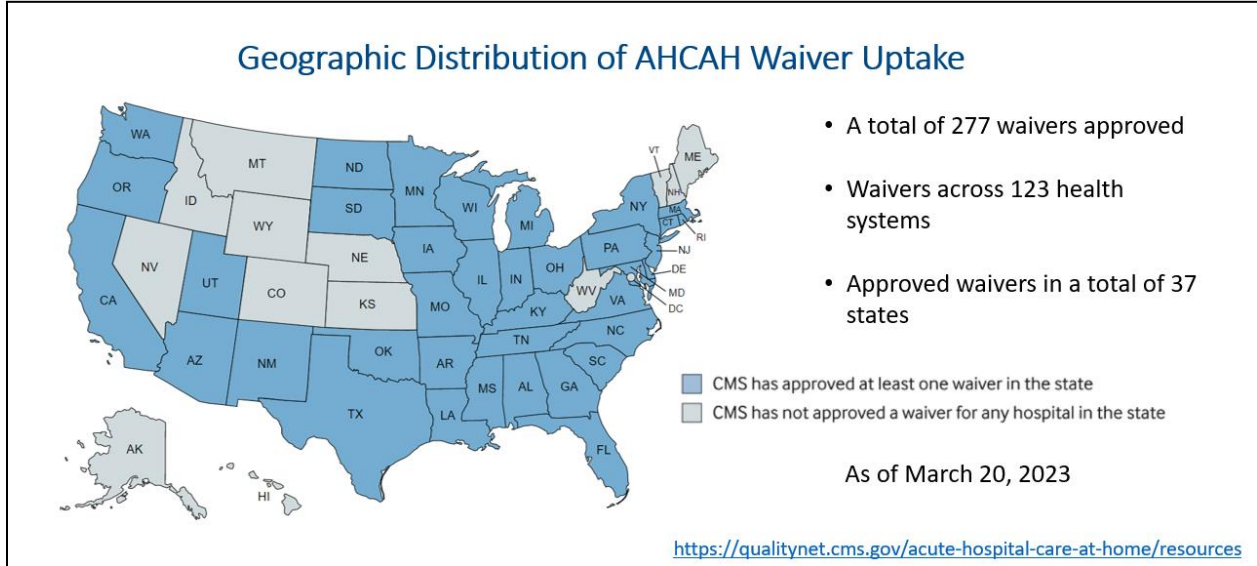

**eTable 1. Standard Operating Procedure for CMS Evaluation of Unexpected Mortality of a patient served by a hospital with an approved AHCAH waiver.**

## **Unexpected Mortality Evaluation SOP**

- **Critical alert for unexpected mortality received and reviewed by CMS team member within 24 hours**
  - Hospital POC contacted for supplemental information and details of the case
- **Supplemental information reviewed upon receipt;** call scheduled with hospital team to review details
- **Questions discussed during scheduled call with hospital**
  - What were the circumstances in which the patient was escalated back to the brick and mortar facility?
  - If the patient was not escalated back to the facility, what details informed the decision?
  - What was the response time from the initial change in condition to in-person contact with the patient?
  - How long did it take to get the patient back to the brick and mortar facility?
  - How did the program communicate with hospital staff about the return to the brick and mortar facility?
  - Did the hospital safety committee, or other workgroup, review the case?
  - What, if any, were the lessons learned by the program that could have affected the outcome?
- **CMS team reviews complete case information**
  - Identify key lessons learned and assess whether, overall, the HaH team
    - communicated well, and addressed changing needs in a timely fashion
    - appropriately escalated their patient (if applicable)
    - followed their established protocols
    - any concerns about this being an inappropriate admission to the HaH program
    - any concerns about the way the HaH team worked to honor the patient and family wishes during the course of care (if appropriate)

**eTable 2. Attributes of a successful Acute Hospital Care at Home waiver (participation) request.**

### **Attributes of a Successful AHCAH Waiver Request**

- **Standardize and socialize the team approach to care**
  - Clarify how the Hospital at Home team coordinates and continually communicates (daily huddles, interdisciplinary rounds, other)
  - Describe how the team supports a seamless patient transition to and from the home on day of admission, for routine diagnostics or urgent evaluation
- **Ensure the patient makes a clearly informed decision to participate in the Hospital at Home program**
  - Clearly review program expectations, possibility of escalation and details of program operations with patient and family or support person (if applicable)
  - Confirm code status, further clarify advance care planning desires; consider palliative care consultation if appropriate when patient admitted to HaH service
- **Develop a robust pharmacy workflow**
  - Leverage inpatient pharmacy expertise to coordinate ordering, dispensing, and delivery
  - Ensure real-time observation and documentation of any self-administration of medications
- **Identify clear protocols for oxygen and other DME delivery and function**
  - Demonstrate clear roles for medication administration among clinical staff
  - Designate a Hospital at Home care team member as the responsible party to confirm equipment is properly functioning, consistent with clinical orders
- **Coordinate with, and supervise, vendors and third party contractors**
  - Outline expectations of contracted entities to ensure clear expectations for performance, clinical documentation, and communication with the HaH team
  - Ensure clear lines of supervision which ultimately rest with hospital staff such as the Chief Nursing Officer
- **Ensure seamless data collection and communication**
  - Describe how critical diagnostic alerts are communicated to team members
  - Outline how vitals and other information gathered by technology integrates with the medical record
- **Develop a robust workflow for triage, evaluation and escalation**
  - Outline team capability for triage and response by HaH care team members at all hours of day or night
  - Maintain a standardized protocol for communication between EMS/911, HaH team members and receiving facility staff in the event of an escalation
  - Confirm ongoing communication and coordination with local EMS (as applicable) to ensure patients are appropriately identified and brought to the hospital if escalation is necessary
  - Familiarize patient and family with care expectations including possibility of escalation should clinical condition change
