# Supplementary material for: Initial Findings From an Acute Hospital Care at Home Waiver Initiative
Source: PubMed Central journal article supplement (PMC10625041; doi:10.1001/jamahealthforum.2023.3667), 2023-11-03
Supplement: jamahealthforum-e233667-s002.pdf [file jamahealthforum-e233667-s002.pdf]

## Data Sharing Statement

Adams. Initial Findings From an Acute Hospital Care at Home Waiver Initiative. *JAMA Health Forum*. Published November 03, 2023. doi:10.1001/jamahealthforum.2023.3667

### Data

**Data available:** Yes

**Data types:** Deidentified participant data, Data dictionary

**How to access data:** The data will be available upon publication in the RESDAC

**When available:** With publication

### Supporting Documents

**Document types:** None

### Additional Information

**Who can access the data:** Researchers who submit a request

**Types of analyses:** For research purposes

**Mechanisms of data availability:** Through application to the RESDAC and approval
